# Supplementary material for: Impacts of large-scale atmospheric circulation changes due to winter sea-ice retreat on Black Carbon transport and deposition to the Arctic
Source: Copernicus journal article supplement (doi:10.5194/acp-2016-1007), 2016-12-22
Supplement: Supplementary file 1 [file acp-2016-1007-supplement.pdf]

# Impacts of large-scale atmospheric circulation changes due to winter sea-ice retreat on Black Carbon transport and deposition to the Arctic

Luca Pozzoli<sup>1</sup>, Srdan Dobricic<sup>1</sup>, Simone Russo<sup>2</sup>, and Elisabetta Vignati<sup>1</sup>

5 <sup>1</sup>European Commission, Joint Research Centre (JRC), Directorate for Energy, Transport and Climate, Air and Climate Unit, Ispra (VA), 21027, Italy

<sup>2</sup>European Commission, Joint Research Centre (JRC), Directorate for Competences, Modelling, Indicators and Impact Evaluation Unit, Ispra (VA), 21027, Italy

Correspondence to: Luca Pozzoli ([luca.pozzoli@jrc.ec.europa.eu](mailto:luca.pozzoli@jrc.ec.europa.eu))

10

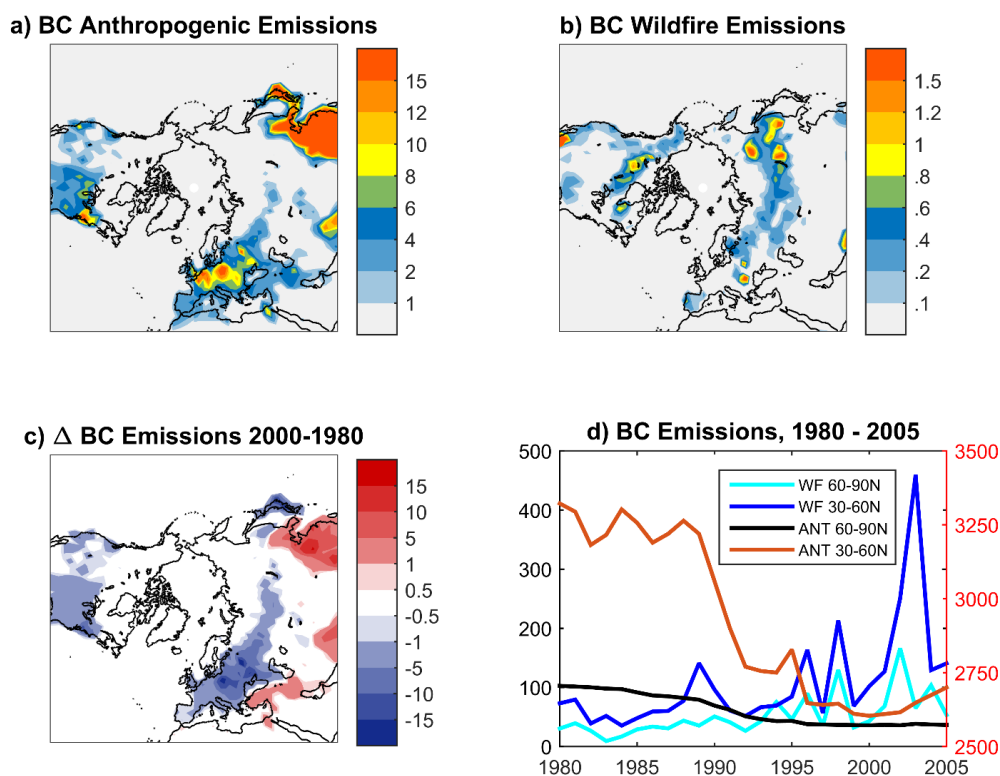

15 **Figure S1 Overview of BC emissions above 30°N as used in the ECHAM5-HAMMOZ simulations: a) multi-annual mean (1980-2005) of total BC anthropogenic emissions (Gg year<sup>-1</sup>); b) multi-annual mean (1980-2005) of total BC wild fire emissions (Gg year<sup>-1</sup>); c) difference of BC total emissions (Gg year<sup>-1</sup>) between years 2000 and 1980; d) annual variability of BC total anthropogenic (ANT) and wild fire (WF) emissions (Gg year<sup>-1</sup>) at mid- (30°N-60°N) and high-latitudes (60°N-90°N) [ANT 30-60N emissions are displayed on the right y-axis].**

a) Wet Dep. [kg/year] FIX1980

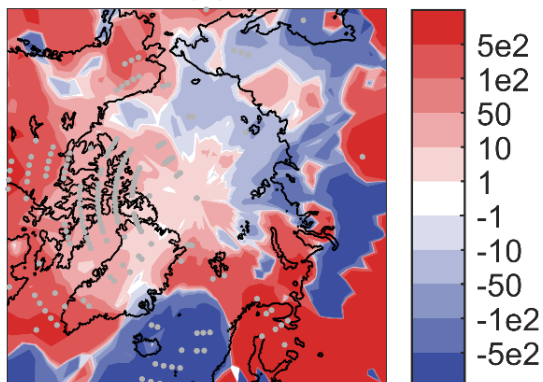

b) Dry Dep. [ $10^{-3}$  kg/year] FIX1980

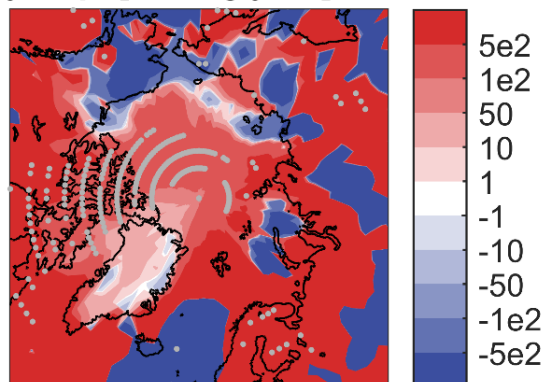

c) Srf. Conc. [ $10^{-3}$  ng/kg/year] FIX1980

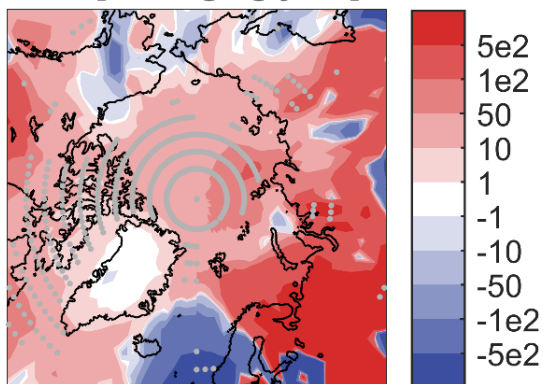

d) Load [ $10^{-2}$  kg/year] FIX1980

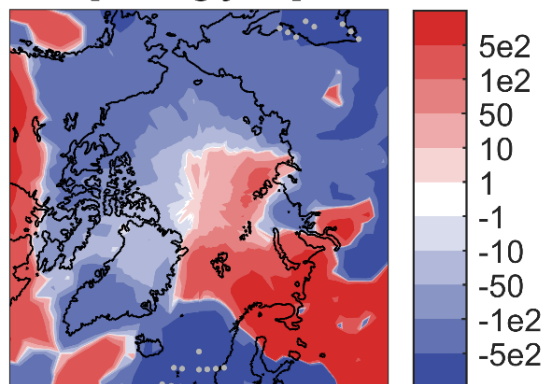

5 Figure S2 Winter (DJF) trends of BC wet deposition (a), dry deposition (b), surface concentration (d), and total load (d) for the ECHAM5-HAMMOZ FIX1980 simulation. Grey dots represent the grid points with trend significant at 5% level.

BC Load [ $10^{-2}$  kg/year]

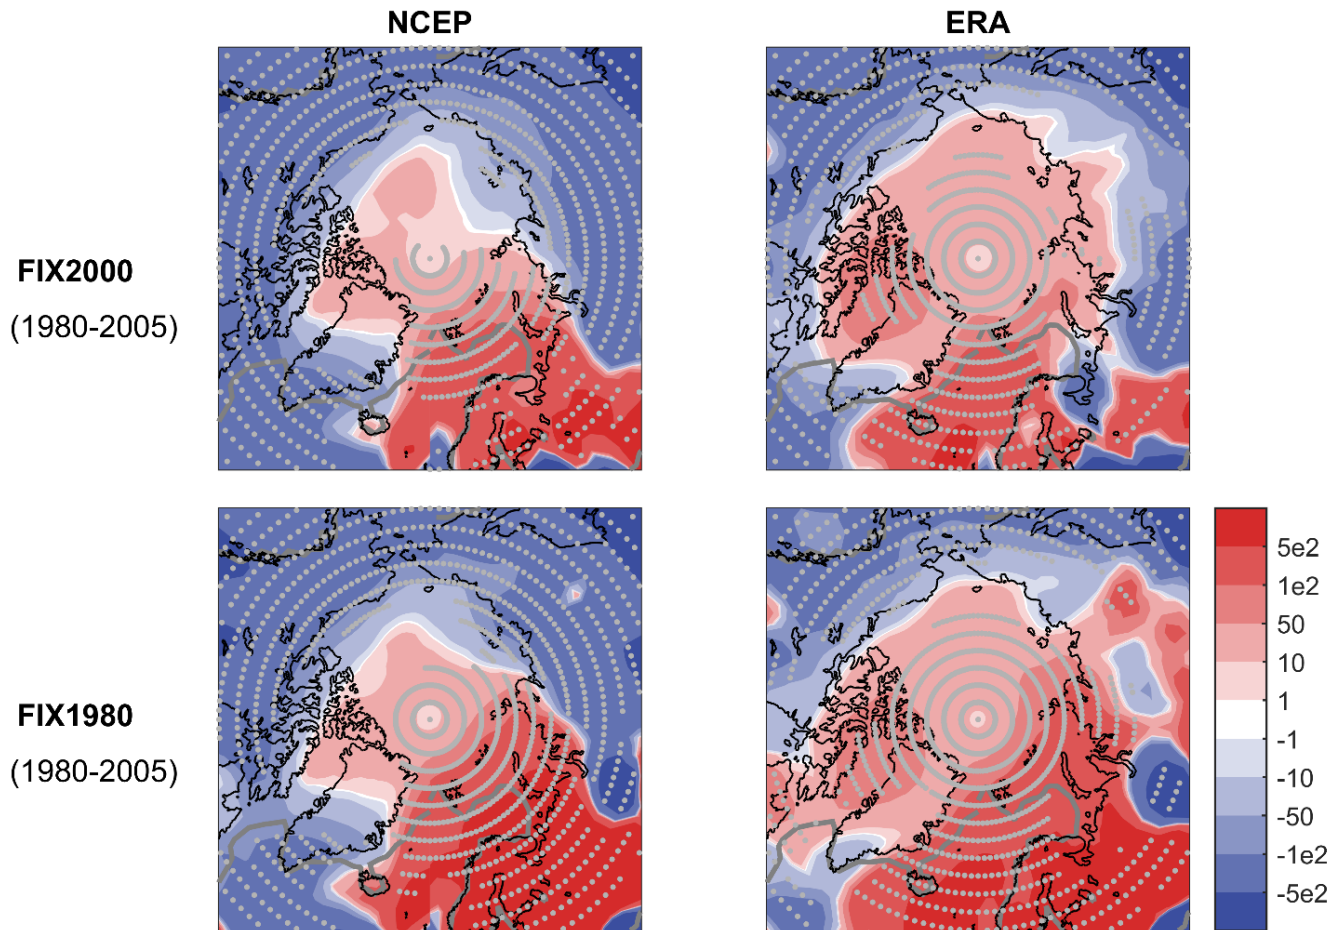

Figure S3 Four different estimates (see also Table 1) of total trends of maximum likelihood BC load associated to three atmospheric circulation patterns (Total=NAO+SB+ENSO). The grey line represents the mean winter sea ice and snow cover larger than 50% since 1980 to now. Grey dots represent the grid points with trend significant at 5% level.

BC Load [ $10^{-2}$  kg/year]

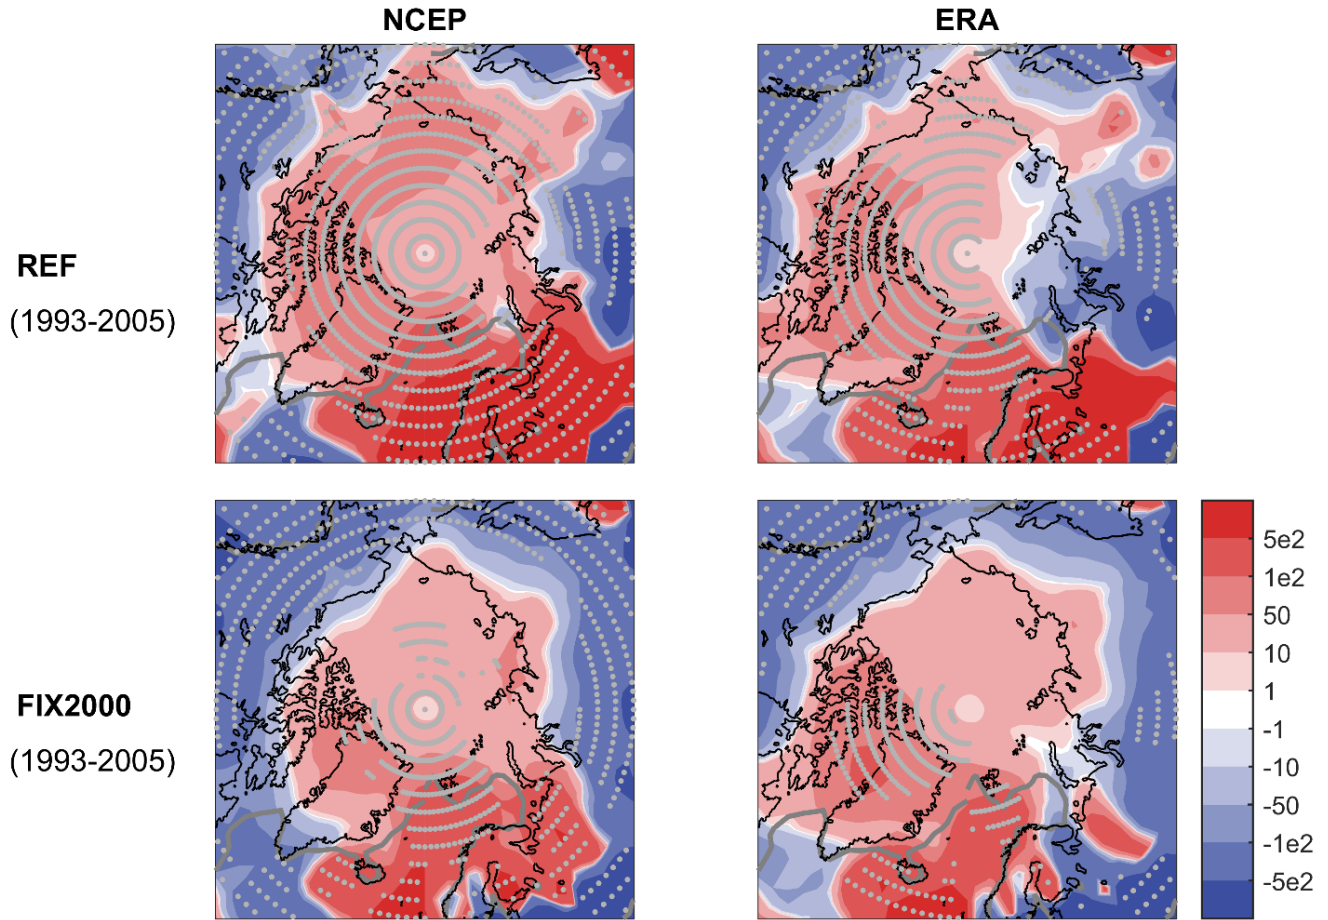

Figure S4 Four different estimates (see also Table 1) of total trends of maximum likelihood BC load associated to three atmospheric circulation patterns (Total=NAO+SB+ENSO). The grey line represents the mean winter sea ice and snow cover larger than 50% since 1980 to now. Grey dots represent the grid points with trend significant at 5% level.

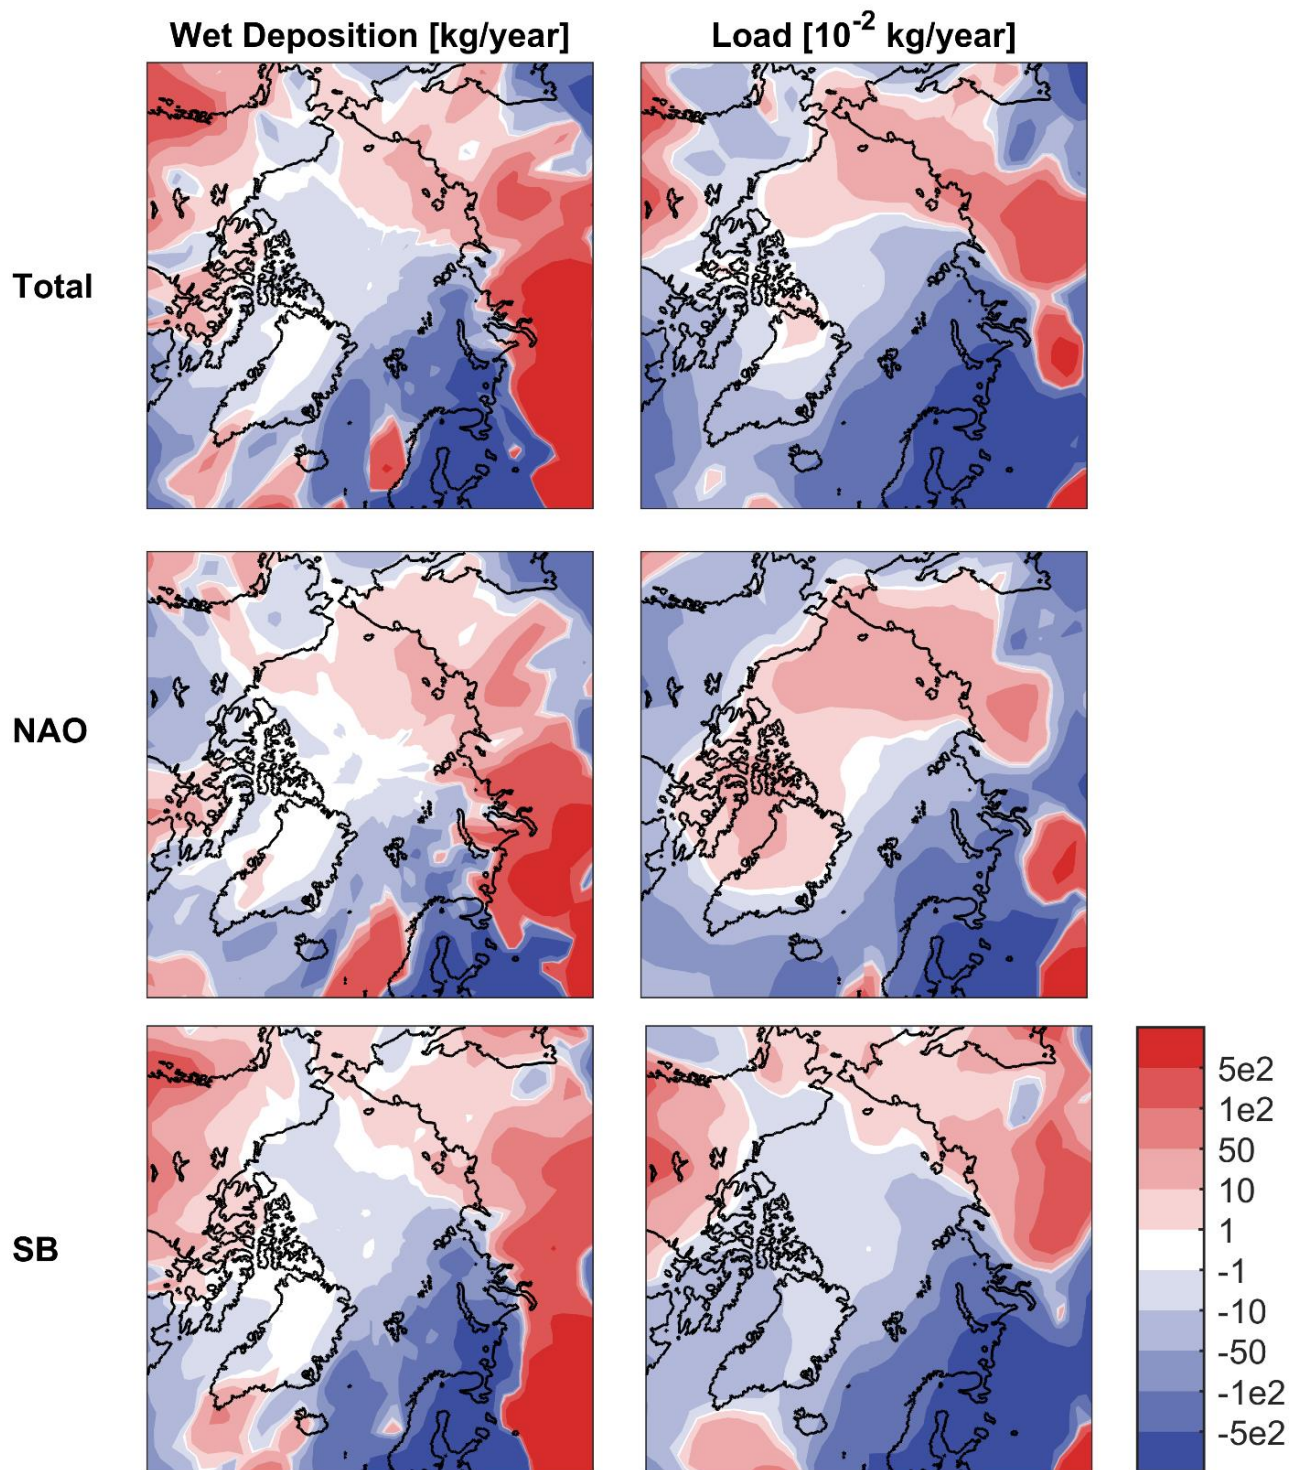

Figure S5 Differences between trend of MLE of BC wet deposition and load from the FIX2000 and FIX1980 chemistry-climate model simulations.
